# Supplementary material for: Combined secondary compounds naturally found in nectars enhance honeybee cognition and survival
Source: Oxford University Press journal article supplement (doi:10.1242/jeb.239616), 2021-02-18
Supplement: jeb239616supp.pdf [file jeb239616supp.pdf]

**Table S1. Olfactory classical PER conditioning.** Set of variables considered in the logistic regression models (GLM) effects models explaining bees' responses in the olfactory PER conditioning to different compounds.

| Compound        | Phase       | Variable        | Chi sq | P-values        |
|-----------------|-------------|-----------------|--------|-----------------|
| <i>Caffeine</i> | Acquisition | TrialxTreatment | 33.13  | 0.7687          |
|                 |             | Treatment       | 21.93  | <b>0.0173</b>   |
|                 |             | Trial           | 57.23  | <b>2.30E-09</b> |
| <i>Arginine</i> | Acquisition | TrialxTreatment | 4.67   | 0.5865          |
|                 |             | Treatment       | 48.22  | <b>3.42E-08</b> |
|                 |             | Trial           | 22.61  | <b>0.0486</b>   |
| <i>Mixtures</i> | Acquisition | TrialxTreatment | 3.31   | 0.7690          |
|                 |             | Treatment       | 80.72  | <b>0.0177</b>   |
|                 |             | Trial           | 37.13  | <b>4.32E-05</b> |

**Table S2. Short-term memory and long-term memory tests.** Statistical evaluation of the logistic regression models (GLM) that include treatment as the only explanatory variable in the tests of short-term memory (STM) and long-term memory (LTM). Values in **bold** represent P-values<0.05, and in *italic* P-values>0.05 by no more than one order of magnitude of difference.

| Compound        | Phase | Variable  | Deviance | P-values      |
|-----------------|-------|-----------|----------|---------------|
| <i>Caffeine</i> | STM   | Treatment | 59.08    | <i>0.0521</i> |
|                 | LTM   | Treatment | 22.92    | 0.3180        |
| <i>Arginine</i> | STM   | Treatment | 5.47     | <i>0.0650</i> |
|                 | LTM   | Treatment | 59.22    | <i>0.0518</i> |
| <i>Mixtures</i> | STM   | Treatment | 74.34    | <b>0.0041</b> |
|                 | LTM   | Treatment | 10.80    | <b>0.0045</b> |

**Table S3. Short-term memory and long-term memory tests. Comparisons.** Z ratio values (below diagonal) and p-values (above diagonal) obtained from comparisons between treatments given by the mixtures group since it was the only one that showed significant differences in the GLM that included the treatment as an explanatory variable. “Lower conc.” stands for the mix between Caf. 0,15mM + Arg. 0.01mM, and “Higher conc.” stands for the mix between Caf. 0.15mM + Arg. 0.03mM. Values in **bold** represent P-values<0.05, and in *italic* P-values>0.05 by no more than one order of magnitude of difference.

| <i>STM</i>   |             |               |               |
|--------------|-------------|---------------|---------------|
| Treatment    | SS Mixtures | Lower conc.   | Higher conc.  |
| SS Mixtures  |             | <i>0.0502</i> | <b>0.0196</b> |
| Lower conc.  | 2.34        |               | 0.9157        |
| Higher conc. | -2.69       | -0.40         |               |
| <i>LTM</i>   |             |               |               |
| Treatment    | SS Mixes    | Lower conc.   | Higher conc.  |
| SS Mixtures  |             | <b>0.0102</b> | <b>0.0277</b> |
| Lower conc.  | 2.90        |               | 0.8021        |
| Higher conc. | -2.56       | 0.63          |               |

**Table S4. Survival.** Statistical analysis of the logistic regression models (GLM) that include treatment as the only explanatory variable of the survival of individuals over 24 hours after the olfactory classical conditioning and tests protocols. “Lower conc.” stands for the mix between Caf. 0,15mM + Arg. 0.01mM, and “Higher conc.” stands for the mix between Caf. 0.15mM + Arg. 0.03mM

| Compound        | Phenomenon analyzed | Variable  | Deviance | P-values       |
|-----------------|---------------------|-----------|----------|----------------|
| <i>Caffeine</i> | Survival            | Treatment | 0.386    | 0.82450        |
| <i>Arginine</i> | Survival            | Treatment | 3.293    | 0.19270        |
| <i>Mixtures</i> | Survival            | Treatment | 17.646   | <b>0.00015</b> |

**Table S5. Survival. Comparisons.** Z ratio values (below diagonal) and p-values (above diagonal) obtained from comparisons between treatments given by the mixtures group since it was the only one that showed significant differences in the GLM that included the treatment as an explanatory variable. “Lower conc.” stands for the mix between Caf. 0,15mM + Arg. 0.01mM, and “Higher conc.” stands for the mix between Caf. 0.15mM + Arg. 0.03mM

| Treatment    | SS Mixtures | Lower conc. | Higher conc. |
|--------------|-------------|-------------|--------------|
| SS Mixtures  |             | 0.691       | <b>0.014</b> |
| Lower conc.  | 2.34        |             | <b>0.044</b> |
| Higher conc. | 2.69        | 0.40        |              |
